# Supplementary material for: A novel method to handle Rayleigh scattering in three-way excitation-emission fluorescence data
Source: Royal Society of Chemistry journal article supplement (doi:10.1039/c2ay25646k), 2012-01-01
Supplement: c2ay25646k.pdf [file c2ay25646k.pdf]

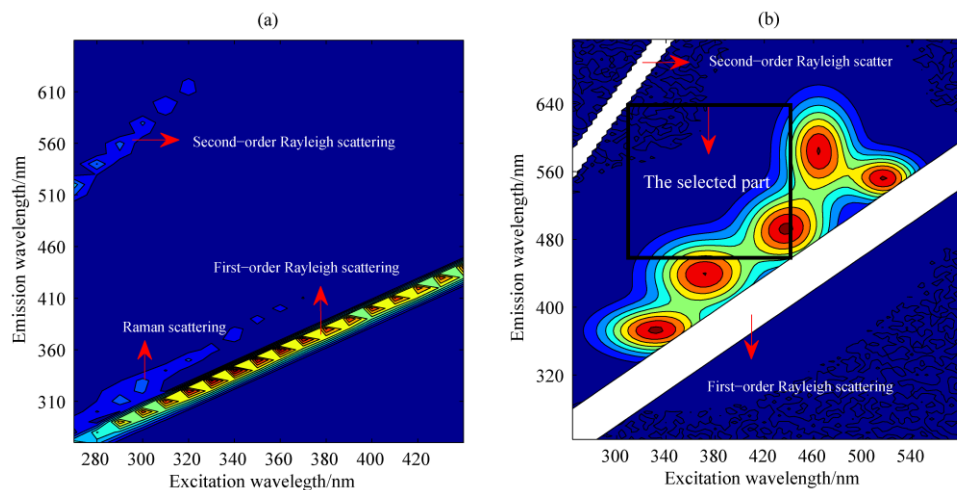

**Fig. 1** (a) is the EEM spectra of a water sample, where the light scatterings are signed. (b) is a simulated EEM where Rayleigh scatterings are substituted by missing: the black rectangular scope shows the selected data, suggesting that it is unavoidable to lose massive information by the selecting method.

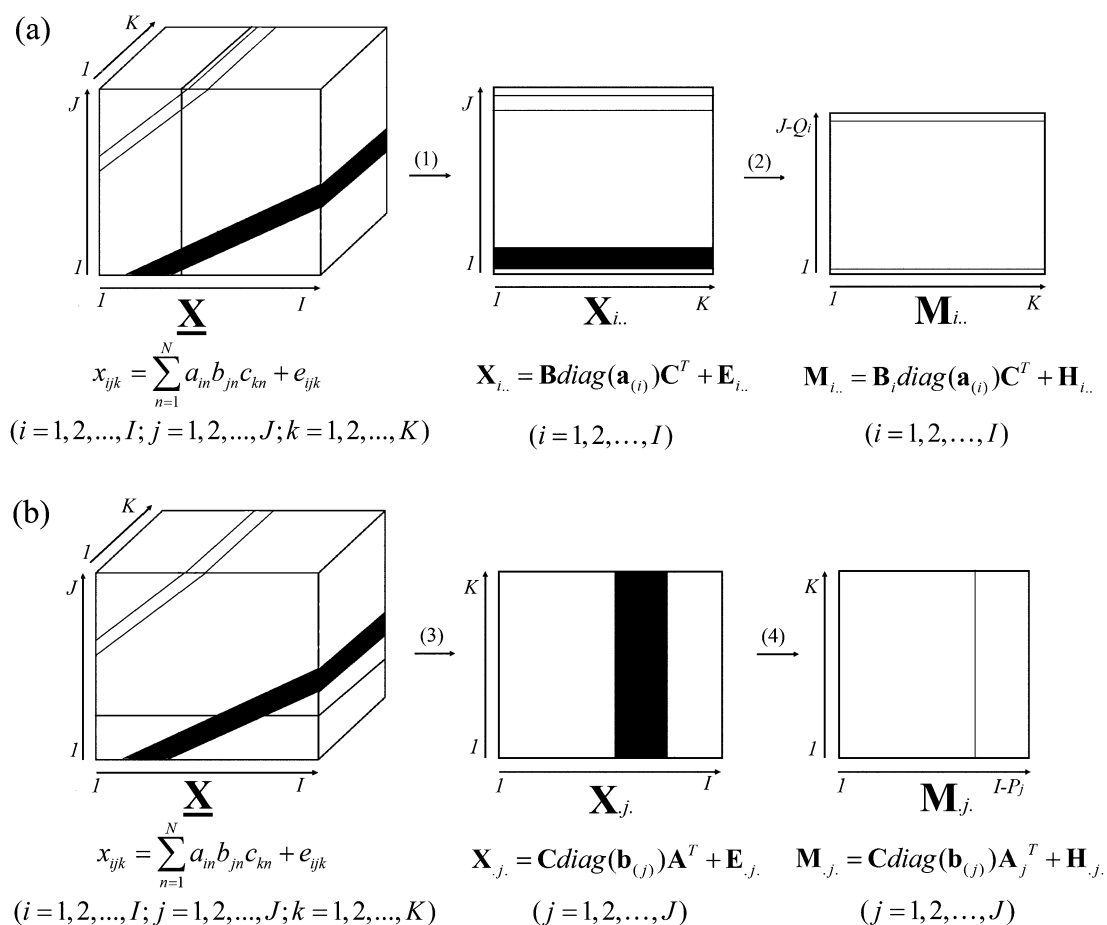

**Fig. 2** The graphical representation of procedure of the strategy, two-direction resection for trilinear model: (a) is the process of obtaining the rest matrix  $\mathbf{M}_{i..}$  by resecting the Rayleigh scattering region from  $\mathbf{X}_{i..}$ ; similarly, the rest matrix  $\mathbf{M}_{.j.}$  could be obtained from (b). The black and gray regions indicate first- and second-order Rayleigh scatterings, respectively. Steps (1), (2), (3) and (4) express the processes of getting  $\mathbf{X}_{i..}$ ,  $\mathbf{M}_{i..}$ ,  $\mathbf{X}_{.j.}$  and  $\mathbf{M}_{.j.}$  respectively.

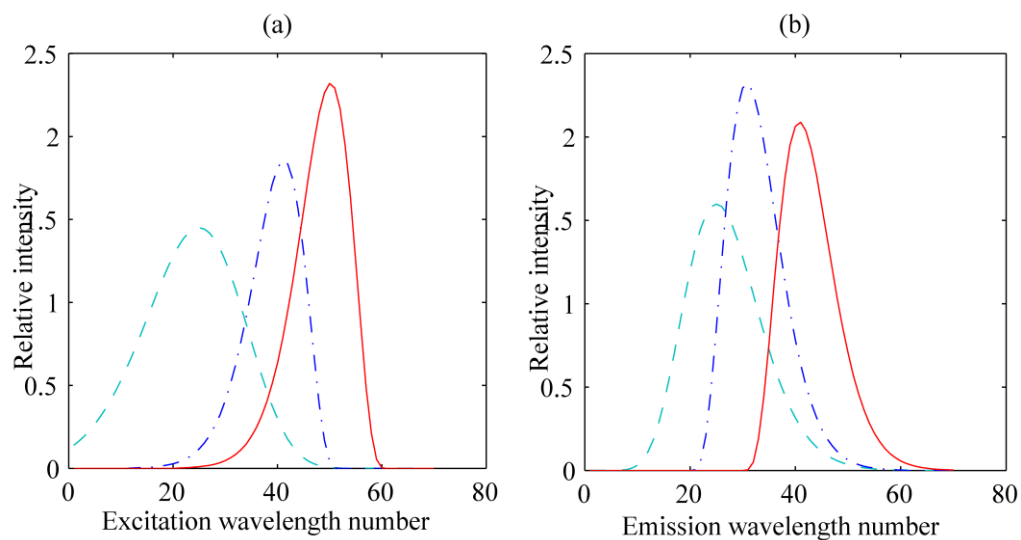

**Fig. 3** Normalized profiles of the simulated data: (a) and (b) represent the simulated excitation and emission profiles, respectively. Solid, dot-dashed and dashed lines represent components 1, 2 and 3, respectively.

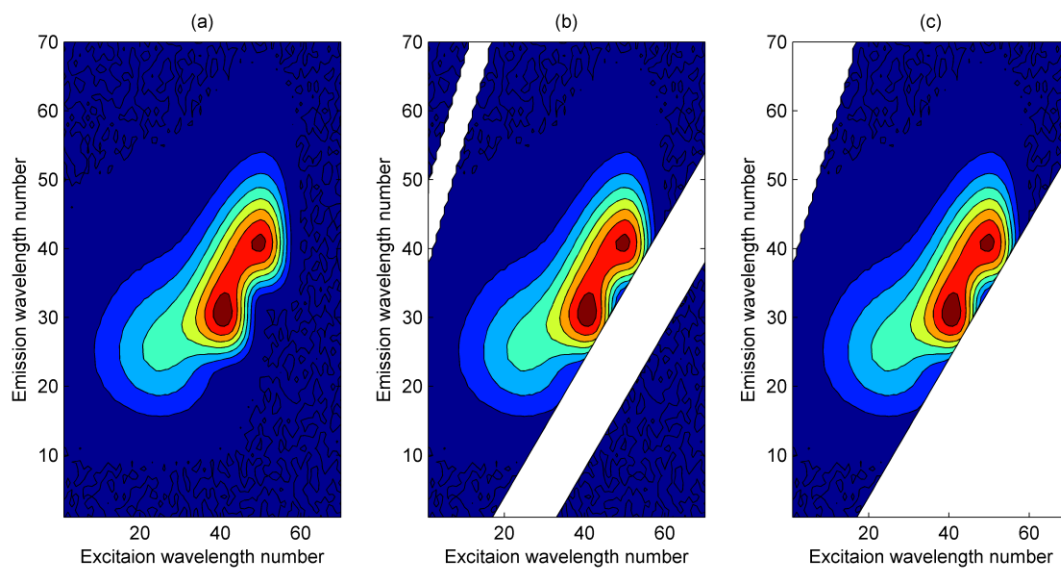

**Fig. 4** EEMs of the 10th sample from the simulated data set at the large width of Rayleigh scattering: (a) the original data without Rayleigh scattering; (b) Rayleigh scattering added in this EEM is substituted by missing; (c) the EEM treated by IMV-PARAFAC.

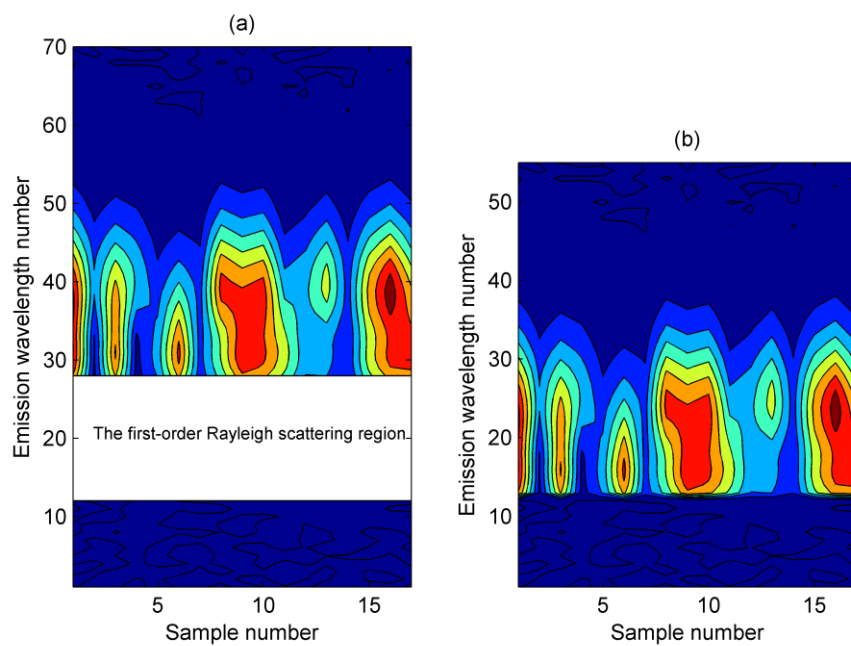

**Fig. 5** The process of handling the matrix  $\mathbf{X}_{i..}$  ( $i=45$ ) by TDR-PARAFAC: (a) the original EEM; (b) its scattering region is removed.

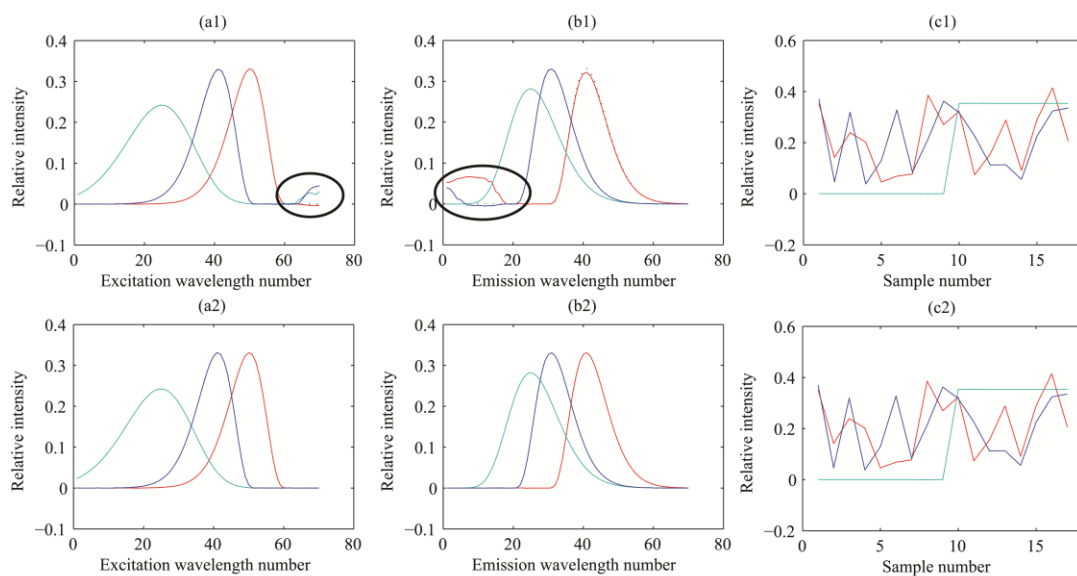

**Fig. 6** Normalized resolved (solid line) and actual (dotted line) profiles of the simulated data with the small bandwidth of Rayleigh scattering: (a1)-(b1)-(c1) for IMV-PARAFAC; (a2)-(b2)-(c2) for TDR-PARAFAC.

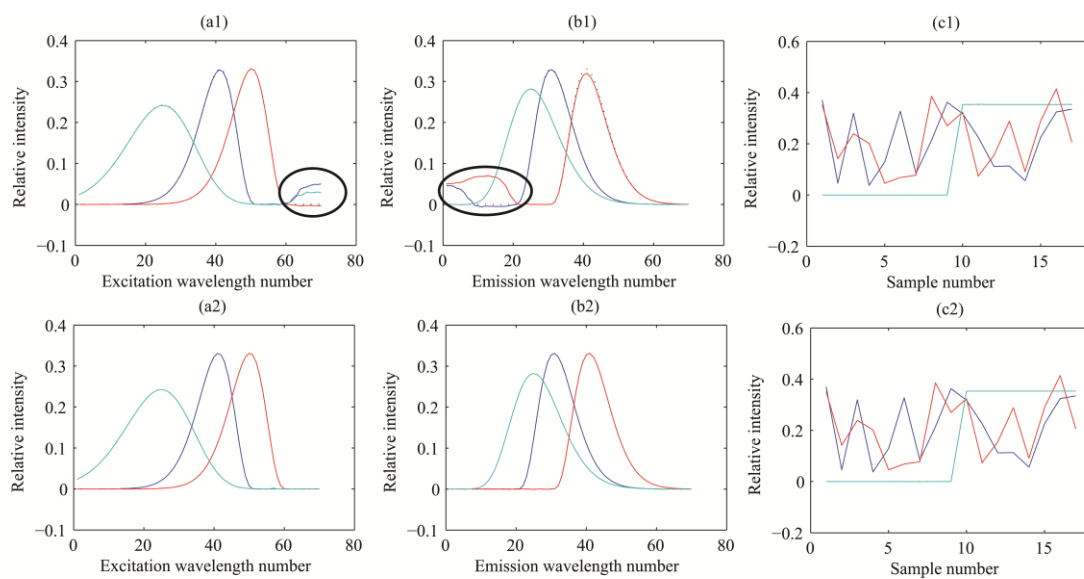

**Fig. 7** Normalized resolved (solid line) and actual (dotted line) profiles of the simulated data with the large bandwidth of Rayleigh scattering: (a1)-(b1)-(c1) for IMV-PARAFAC; (a2)-(b2)-(c2) for TDR-PARAFAC.

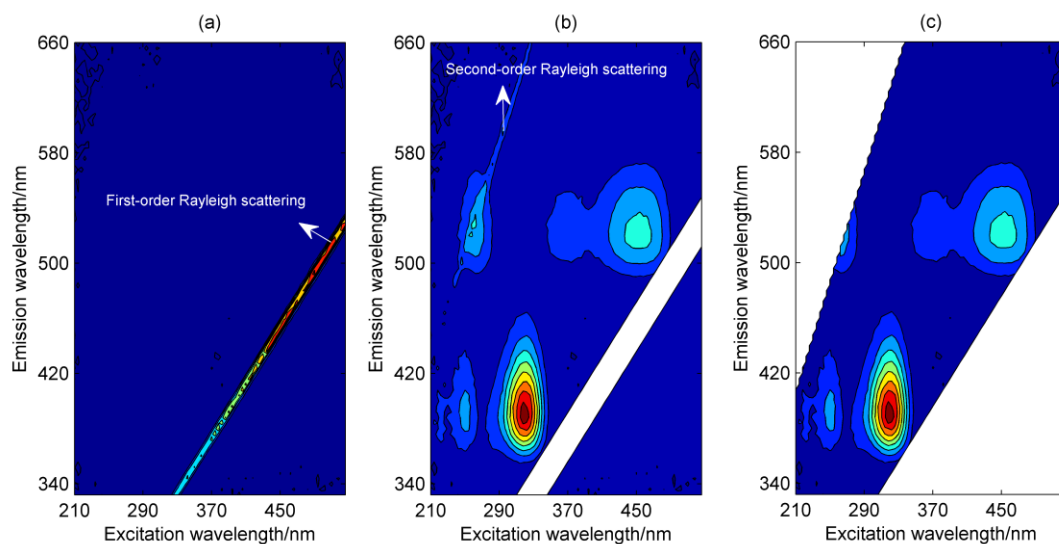

**Fig. 8** EEMs of the 7th calibration sample from the real data set I: (a) the original one; (b) the first-order Rayleigh scattering region is substituted by missing; (c) the EEM is treated by IMV-PARAFAC.



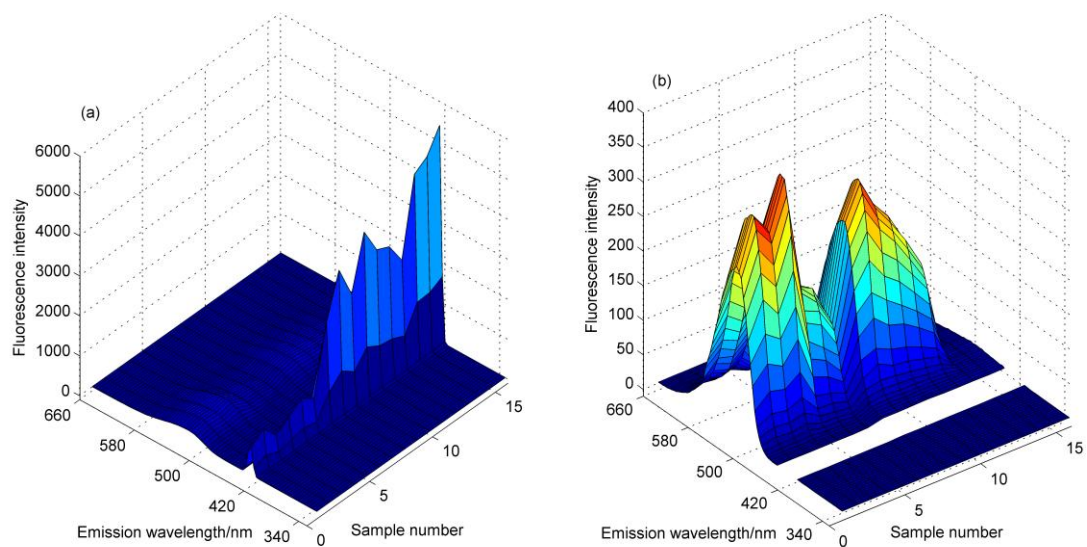

**Fig. 9** The landscapes of  $\mathbf{X}_{i..}$  ( $i=55$ ) in the real data set I: (a) the original one; (b) its Rayleigh scattering region is substituted by missing.

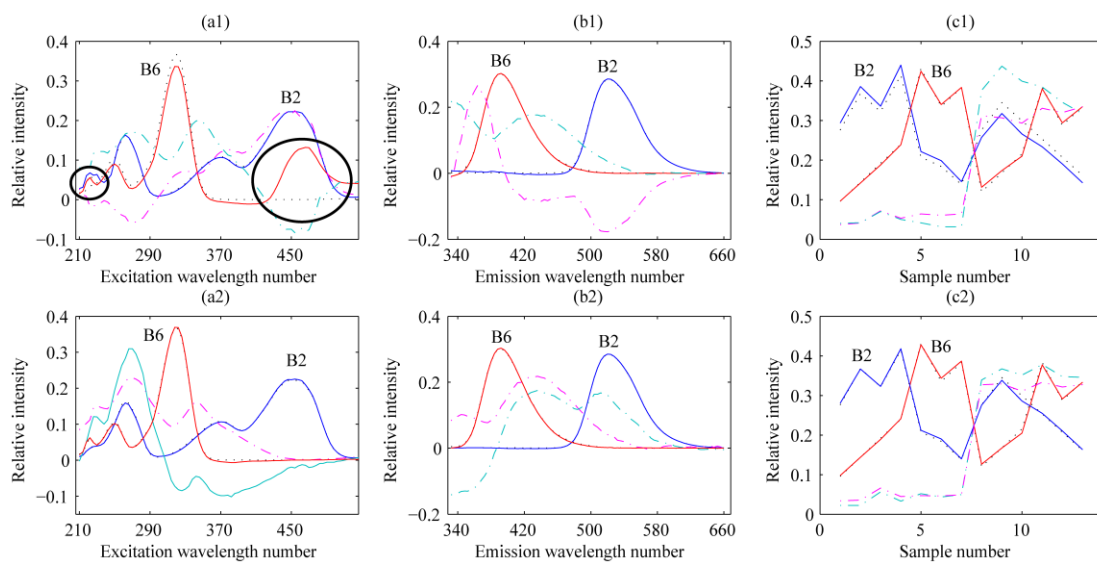

**Fig. 10** Normalized resolved (solid line) and actual (dotted line) profiles in the real data I: (a1)-(b1) for IMV-PARAFAC; (a2)-(b2) for TDR-PARAFAC. Dash-dotted lines represent the resolved spectra profiles of interferences.

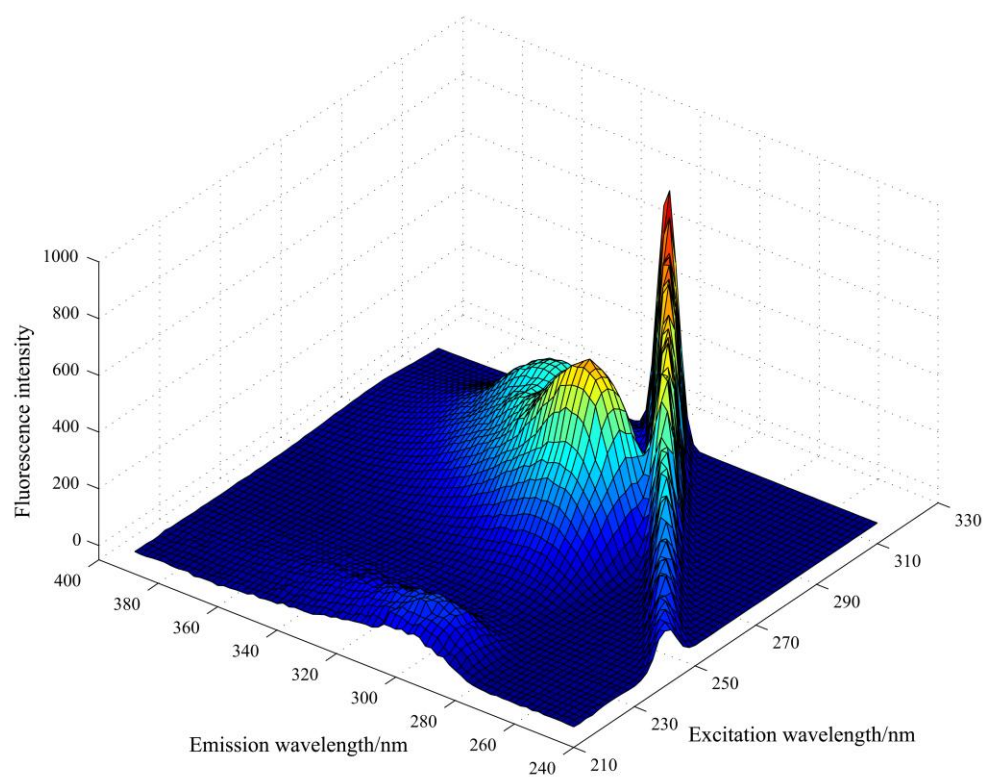

**Fig. 11** The landscape of the calibration sample 5 in the real data set II.

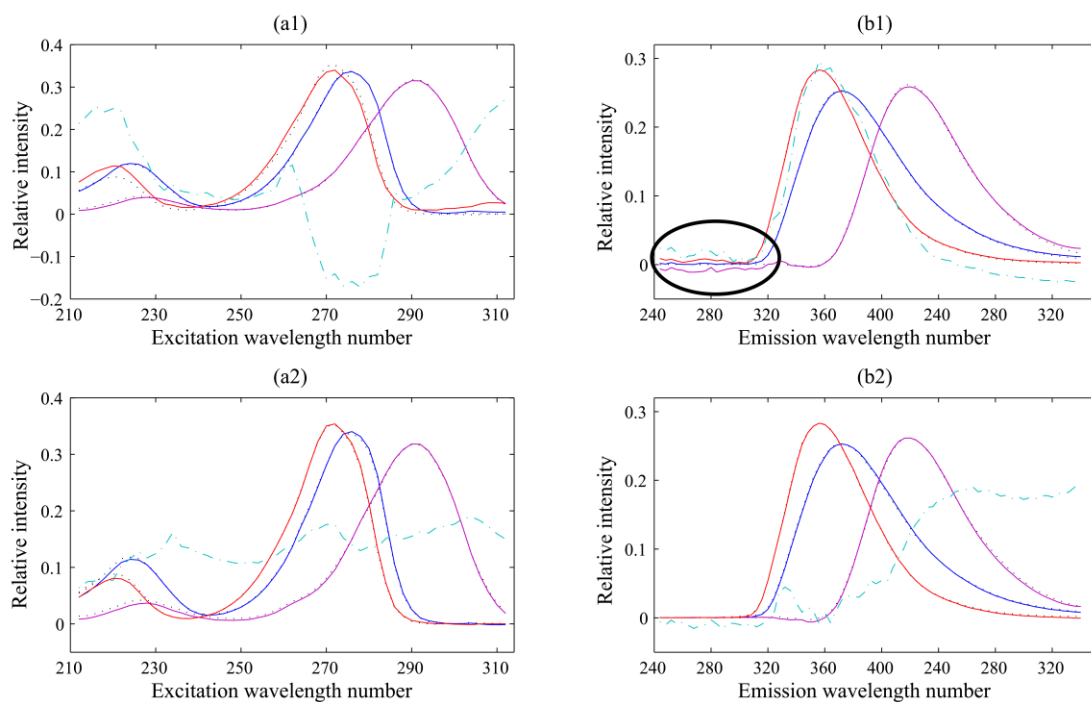

**Fig. 12** Normalized resolved (solid line) and actual (dotted line) profiles in the real data II: (a1)-(b1) for IMV-PARAFAC; (a2)-(b2) for TDR-PARAFAC. Dash-dotted lines represent the resolved spectra profiles of interferents.

**Table 1.** Results from IMV-PARAFAC and TDR-PARAFAC in the real data set I.

| Test Sample               | Vitamin B2/ ng mL <sup>-1</sup> |             |             | Vitamin B6/ ng mL <sup>-1</sup> |             |             |
|---------------------------|---------------------------------|-------------|-------------|---------------------------------|-------------|-------------|
|                           | Actual                          | IMV-PARAFAC | TDR-PARAFAC | Actual                          | IMV-PARAFAC | TDR-PARAFAC |
| 1                         | 120                             | 105.4       | 118.6       | 134                             | 147.5       | 140.3       |
| 2                         | 150                             | 130.6       | 146         | 187.6                           | 194.8       | 186.2       |
| 3                         | 130                             | 109.1       | 123.1       | 241.2                           | 235.8       | 227.8       |
| 4                         | 110                             | 95.7        | 109.4       | 428.8                           | 426.9       | 419.9       |
| 5                         | 90                              | 77.6        | 89.9        | 321.6                           | 330.2       | 324.1       |
| 6                         | 70                              | 57.9        | 69.2        | 375.2                           | 376.2       | 371         |
| Average                   |                                 | 85.8±2.0    | 98.2±1.9    |                                 | 102.4±4.4   | 99.3±3.4    |
| Recovery/%                |                                 |             |             |                                 |             |             |
| RMSEP/ng mL <sup>-1</sup> |                                 | 17.5        | 3.6         |                                 | 8.3         | 8.1         |

**Table 2.** Results from IMV-PARAFAC and TDR-PARAFAC in the real data set II.

| Test Sample                | Phenol/ $\mu\text{g ml}^{-1}$ |             |             | Resorcinol/ $\mu\text{g ml}^{-1}$ |             |             | Hydroquinone/ $\mu\text{g ml}^{-1}$ |             |             |
|----------------------------|-------------------------------|-------------|-------------|-----------------------------------|-------------|-------------|-------------------------------------|-------------|-------------|
|                            | Actual                        | IMV-PARAFAC | TDR-PARAFAC | Actual                            | IMV-PARAFAC | TDR-PARAFAC | Actual                              | IMV-PARAFAC | TDR-PARAFAC |
| 1                          | 0.232                         | 0.230       | 0.236       | 1.013                             | 1.022       | 1.026       | 0.300                               | 0.317       | 0.307       |
| 2                          | 0.697                         | 0.689       | 0.701       | 1.182                             | 1.093       | 1.090       | —                                   | —           | —           |
| 3                          | —                             | —           | —           | —                                 | —           | —           | 0.400                               | 0.427       | 0.416       |
| 4                          | 0.116                         | 0.115       | 0.114       | 0.506                             | 0.438       | 0.444       | 0.700                               | 0.700       | 0.690       |
| 5                          | 0.349                         | 0.340       | 0.340       | —                                 | —           | —           | —                                   | —           | —           |
| 6                          | 0.581                         | 0.580       | 0.588       | 0.675                             | 0.663       | 0.652       | 0.200                               | 0.220       | 0.207       |
| 7                          | 0.813                         | 0.786       | 0.784       | —                                 | —           | —           | 0.500                               | 0.501       | 0.491       |
| 8                          | —                             | —           | —           | 0.844                             | 0.790       | 0.785       | —                                   | —           | —           |
| Average                    |                               |             |             |                                   |             |             |                                     |             |             |
| Recovery/%                 |                               | 98.5±1.2%   | 99.2±2.2%   |                                   | 94.3±5.6%   | 94.1±5.1%   |                                     | 104.6±4.4%  | 101.3±2.7%  |
| RMSEP/ $\text{ng mL}^{-1}$ |                               | 0.011       | 0.011       |                                   | 0.044       | 0.045       |                                     | 0.013       | 0.008       |
